# Supplementary material for: Edge-nitrogenated graphene nanoplatelets as high-efficiency counter electrodes for dye-sensitized solar cells
Source: Royal Society of Chemistry journal article supplement (doi:10.1039/c6nr00401f), 2016-01-01
Supplement: c6nr00401f1.pdf [file c6nr00401f1.pdf]

## Electronic supplementary information

Edge-nitrogenated graphene nanoplatelets as high-efficiency counter electrode for  
dye-sensitized solar cells

Guiqiang Wang <sup>a\*</sup>, Juan Zhang <sup>b</sup>, Shuo Huo <sup>a</sup>, Wei Zhang <sup>a</sup>, Zengdian Zhao <sup>b</sup>

<sup>a</sup> School of New Energy, Bohai University, Jinzhou 121013, China

<sup>b</sup> School of Chemical Engineering, Shandong University of Technology, Zibo 255049,  
China

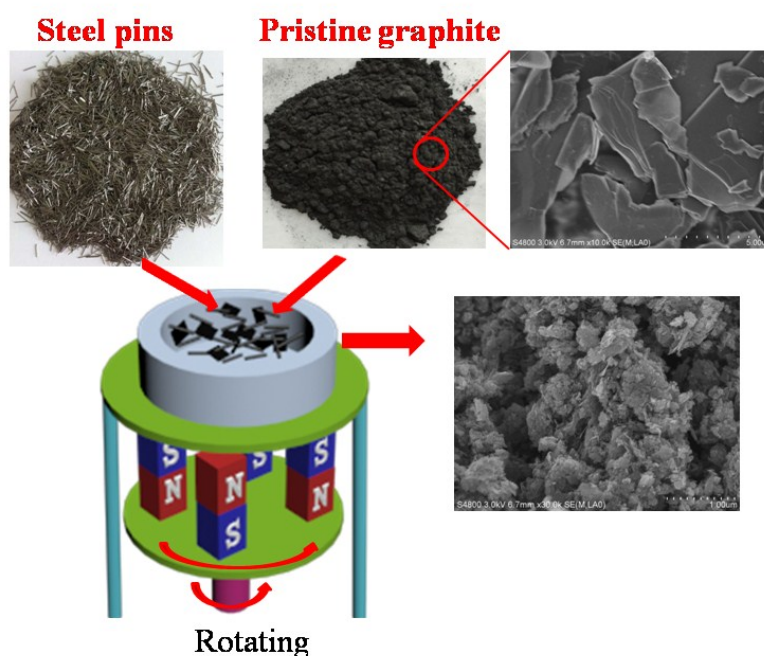

Fig. S1 Schematic illustration of the preparation of ENGPs

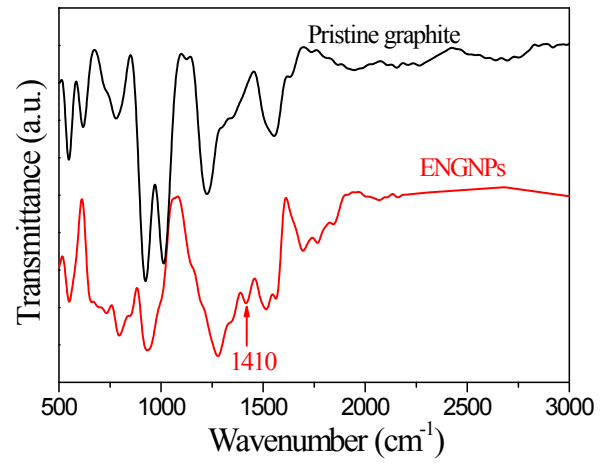

Fig S2 FTIR spectra of pristine graphite and ENGPNs

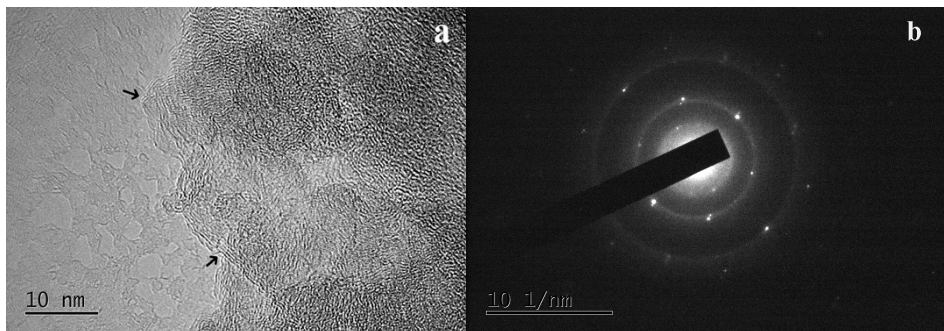

Fig. S3 (a) High-resolution TEM image of ENGPNs, showing strips (see arrows) indicating high crystallinity; (b) the corresponding selected area electron diffraction pattern of ENGPNs

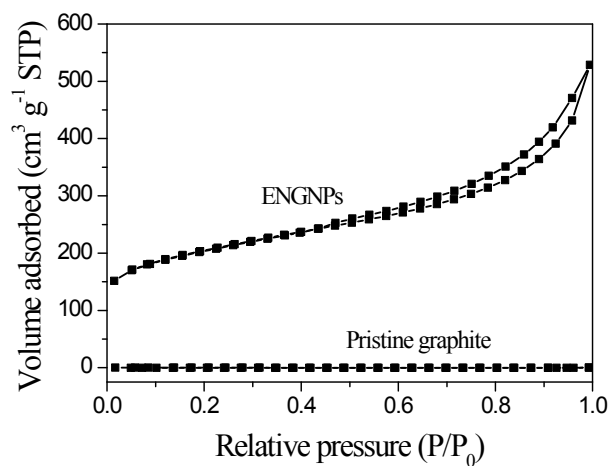

Fig. S4 Nitrogen adsorption-desorption isotherms of ENGPNs and pristine graphite

Table S1 BET surface area and pore volume of ENGPNs and pristine graphite

| <i>Samples</i>    | $S_{BET}^a$ ( $m^2 g^{-1}$ ) | $V_T^b$ ( $cm^3 g^{-1}$ ) |
|-------------------|------------------------------|---------------------------|
| Pristine graphite | 0.27                         | -                         |
| ENGPNs            | 679.15                       | 0.818                     |

<sup>a</sup> BET surface area; <sup>b</sup> total pore volume

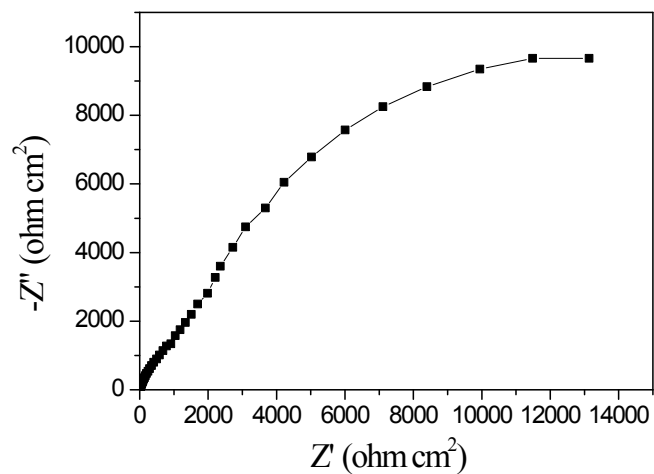

Fig. S5 Nyquist plot of bare FTO glass. The  $R_{ct}$  of bare FTO glass is quite large, and even found to be far beyond the measurement limit, indicating a very poor electrocatalytic activity.

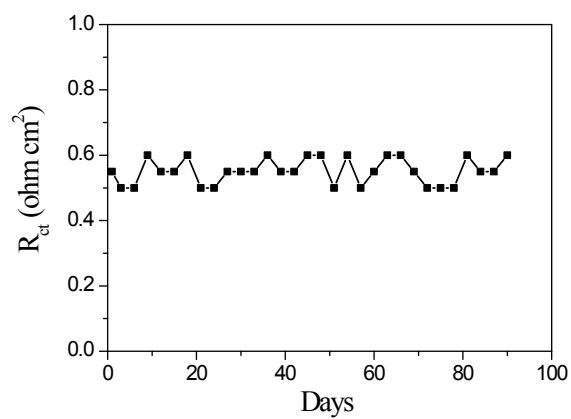

Fig. S6 Variation of  $R_{ct}$  of ENGNP4 electrode with time.

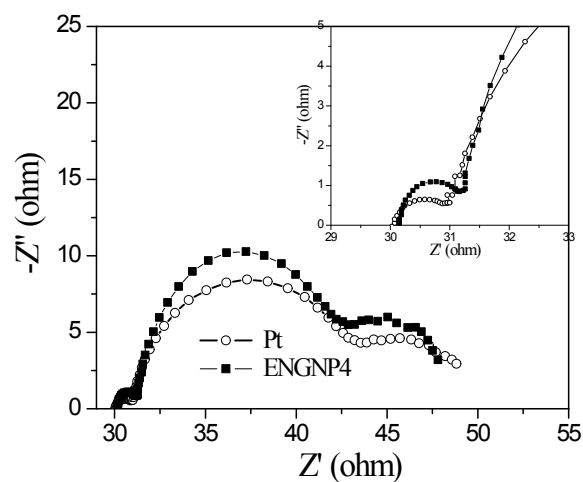

Fig. S7 Nyquist plots of DSCs with ENGNP4 and Pt electrodes under 1 sun illumination at open-circuit condition. The inset is the semicircle at the highest frequency region.

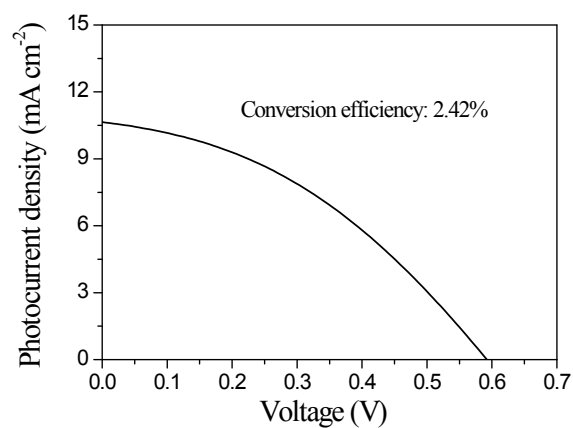

Fig. S8 Photocurrent density-voltage curve of the DSC with pristine graphite counter electrode
